# Supplementary material
Source: PubMed Central journal article supplement (PMC4794687)
Supplement: JVI.03017-15_zjv007161484so1.pdf [file JVI.03017-15_zjv007161484so1.pdf]

## Supplemental Material

Suppl. Table Notable interatomic contacts between poliovirus and VHH

|                  | PV-PVSP6A                                                                                         | PV residues | VHH residues | VHH-structure | Interaction type |
|------------------|---------------------------------------------------------------------------------------------------|-------------|--------------|---------------|------------------|
| <b>North</b>     | VP1 (LP) <sup>a</sup> EF-loop                                                                     | CG1:Val166  | CE1:Phe109   | FG-loop       | hydrophobic      |
| <b>West</b>      | VP1 (LP) H-strand<br>VP1 (LP) C-strand<br>(and vicinity)                                          | CG2:Ile:239 | CE:Met108    | FG-loop       | hydrophobic      |
|                  |                                                                                                   | OD1:Asp102  | NE2:Gln3     | A-strand      | H-bond           |
|                  |                                                                                                   | N:Phe105    | OE1:Gln1     | N-term        | H-bond           |
|                  |                                                                                                   | O:Phe105    | N:Gln1       | N-term        | H-bond           |
|                  |                                                                                                   | CG1:Val107  | CZ:Phe109    | FG-loop       | hydrophobic      |
|                  |                                                                                                   | O:Val107    | N:Phe27      | BC-loop       | proximity        |
| <b>Southwest</b> | VP1 (LP) C-term<br>prox. <sup>a</sup> loop<br>VP2 (LP) EF-loop<br>tip                             | CD1:Trp108  | CZ:Phe29     | BC-loop       | hydrophobic      |
|                  |                                                                                                   | OD2:Asp114  | CE2:Phe29    | BC-loop       | vanderWaals      |
|                  |                                                                                                   | CA:Gly281   | NE2:His31    | BC-loop       | vanderWaals      |
|                  |                                                                                                   | CD:Pro282   | CG:His31     | BC-loop       | hydrophobic      |
|                  |                                                                                                   | CG2:Thr139  | CG2:Thr53    | C'-strand     | hydrophobic      |
|                  |                                                                                                   | OG1:Thr139  | CA:Gly55     | C'C''-strand  | vanderWaals      |
| <b>South</b>     | VP1 (LP) GH-loop                                                                                  | O:Thr140    | NH2:Arg52    | C'-strand     | H-bond           |
|                  |                                                                                                   | OG1:Thr140  | ND1:His31    | BC-loop       | vanderWaals      |
|                  |                                                                                                   | O:Gln167    | C:Val56      | C'C''-strand  | vanderWaals      |
|                  |                                                                                                   | CG:Pro170   | CG:Ser57     | C''-strand    | hydrophobic      |
|                  |                                                                                                   | NZ:Lys214   | OG:Ser105    | FG-loop       | H-bond           |
|                  |                                                                                                   | CE:Lys214   | CB:Cys103    | FG-loop       | hydrophobic      |
| <b>East</b>      | VP1 (RP) <sup>a</sup> C-term<br>dist.ext. <sup>a</sup><br><br>VP3 (RP) B-strand<br>knob insertion | CD1:Leu228  | CB:Ser102    | FG-loop       | hydrophobic      |
|                  |                                                                                                   | CD1:Leu234  | CA:Gly106    | FG-loop       | hydrophobic      |
|                  |                                                                                                   | CD2:Leu234  | C:Ser100     | FG-loop       | hydrophobic      |
|                  |                                                                                                   | CG:Asn235   | CE:Met108    | FG-loop       | hydrophobic      |
|                  |                                                                                                   | CB:Thr296   | C:Lys43      | CC'-loop      | hydrophobic      |
|                  |                                                                                                   | NZ:Lys297   | OE1:Glu44    | CC'-loop      | Salt link        |
| <b>PV-PVSS8A</b> | VP1 (LP) EF-loop                                                                                  | N:Asp298    | OE2:Glu44    | CC'-loop      | H-bond           |
|                  |                                                                                                   | CB:Ala59    | CB:Glu42     | CC'-loop      | hydrophobic      |
|                  |                                                                                                   | NZ:Lys62    | OE1:Glu42    | CC'-loop      | Salt link        |
|                  |                                                                                                   | CG1:Val166  | CZ:Tyr27     | BC-loop       | hydrophobic      |
|                  |                                                                                                   | O:Glu168    | N:Gln1       | N-term        | H-bond           |
|                  |                                                                                                   | OE2:Glu168  | OH:Tyr1115   | G-strand      | proximity        |
| <b>West</b>      | VP1 (LP) C-strand<br>VP1 (LP) GH-loop<br>prox. end                                                | OE2:Glu168  | NH2:Arg100   | FG-loop       | proximity        |
|                  |                                                                                                   | NZ:Lys169   | OE1:Gln1     | N-term        | proximity        |
|                  |                                                                                                   | CG1:Val107  | CD1:Tyr27    | BC-loop       | hydrophobic      |
|                  |                                                                                                   | CG:Asp236   | CG:Phe103    | FG-loop       | hydrophobic      |
| <b>Southwest</b> | VP1 (LP) C-term<br>ext. prox. end<br>VP2 (LP) EF-loop                                             | CG:Pro282   | CZ:Tyr54     | C'C''-loop    | hydrophobic      |
|                  |                                                                                                   | CG2:Thr139  | CG:Asn55     | C'C''-loop    | short            |
|                  |                                                                                                   | O:Thr140    | ND2:Asn55    | C'C''-loop    | H-bond           |
|                  |                                                                                                   | N:Thr140    | OD1:Asn55    | C'C''-loop    | H-bond           |
|                  |                                                                                                   | CD2:His142  | CB:Ala57     | C'C''-loop    | hydrophobic      |
|                  |                                                                                                   | O:Gln167    | SD:Met58     | C'C''-loop    | vanderWaals      |
|                  |                                                                                                   | O:Gln167    | OH:Tyr60     | C''-strand    | H-bond           |
|                  |                                                                                                   | CG2:Thr168  | CA:Gly66     | C''D-loop     | proximity        |
| CG:Pro170        | SD:Met58                                                                                          | C'C''-loop  | proximity    |               |                  |
| <b>South</b>     | VP1 (LP) GH-loop<br>dist. end                                                                     | NZ:Lys214   | OD2:Asp105   | FG-loop       | salt link        |
|                  |                                                                                                   | OD2:Asp226  | NH2:Arg59    | C''-strand    | salt link        |

|                   |                                 |                    |                     |                      |                         |
|-------------------|---------------------------------|--------------------|---------------------|----------------------|-------------------------|
|                   |                                 | O:Ser227           | CD1:Ile106          | FG-loop              | vanderWaals             |
|                   |                                 | N:Leu228           | O:Gly104            | FG-loop              | H-bond                  |
|                   |                                 | CD2:Leu228         | CG1:Ile106          | FG-loop              | hydrophobic             |
|                   |                                 | CD1:Leu228         | CD1:Tyr54           | C'C''-loop           | hydrophobic             |
|                   |                                 | CD1:Leu228         | CD1:Tyr54           | C'C''-loop           | hydrophobic             |
| <b>Center</b>     | VP3 (RP) GH-loop                | O:Asp181           | NH1:Arg102          | FG-loop              | H-bond                  |
|                   |                                 | OD2:Asp181         | NH2:Arg102          | FG-loop              | proximity               |
| <b>PV-PVSP19B</b> |                                 | <b>PV residues</b> | <b>VHH residues</b> | <b>VHH-structure</b> | <b>Interaction type</b> |
| <b>North</b>      | VP1 (LP) EF-loop                | N:Gly163           | CZ3:Trp97           | FG-loop              | vanderWaals             |
|                   |                                 | CG2:Val166         | CB:Trp97            | FG-loop              | hydrophobic             |
|                   |                                 | O:Val166           | NE2:Gln109          | FG-loop              | H-bond                  |
|                   |                                 | OE2:Glu168         | NE2:Gln109          | FG-loop              | proximity               |
|                   |                                 | OE2:Glu168         | NE:Arg98            | FG-loop              | proximity               |
| <b>Northwest</b>  | VP1 (LP) C-strand               | CD2:Phe105         | CB:Gln1             | N-term               | proximity               |
|                   |                                 | O:Phe105           | CB:Gln1             | N-term               | vanderWaals             |
|                   |                                 | CB:Val107          | CE:Met31            | BC-loop              | hydrophobic             |
| <b>West</b>       | VP1 (LP) C-strand               | NZ:Lys109          | OD1:Asn51           | C'C''-loop           | proximity               |
|                   |                                 | N:Lys109           | SG:Cys30            | BC-loop              | vanderWaals             |
|                   | VP1 (LP) GH-loop<br>(proximate) | OD2:Asp236         | ND2:Asn51           | C'C''-loop           | H-bond                  |
|                   |                                 | CG2:Ile239         | NE1:Trp97           | FG-loop              | vanderWaals             |
| <b>Southwest</b>  | VP1 (LP) C-term<br>prox.        | CA:Gly281          | CB:Ala72            | DE-loop              | hydrophobic             |
|                   |                                 | CD:Pro282          | CB:His71            | DE-loop              | hydrophobic             |
|                   | VP2 (LP) EF-loop                | OG1:Thr140         | OD1:Asn70           | DE-loop              | proximity               |
|                   |                                 | CE:Met141          | CD2:His71           | DE-loop              | hydrophobic             |
| <b>South</b>      | VP1 (LP) GH-loop<br>(dist.)     | OG:Ser213          | N:Gly53             | C'C''-loop           | proximity               |
|                   |                                 | CD1:Leu228         | O:Gly53             | C'C''-loop           | vanderWaals             |
|                   |                                 | CB:Ala231          | CA:Asp52            | C'C''-loop           | hydrophobic             |
| <b>Center</b>     | VP3 (RP) GH-loop                | CB:Ile180          | CZ2:Trp99           | FG-loop              | hydrophobic             |
|                   |                                 | O:Asp181           | NZ:Lys49            | C'-strand            | H-bond                  |
|                   |                                 | OD1:Asp182         | OD2:Asp52           | C'C''-loop           | vanderWaals             |
| <b>PV-PVSS21E</b> |                                 | <b>PV residues</b> | <b>VHH residues</b> | <b>VHH-structure</b> | <b>Interaction type</b> |
| <b>North</b>      | VP1 (LP) EF-loop                | CG2:Val166         | CE1:Tyr55           | C'C''-loop           | hydrophobic             |
|                   |                                 | O:Pro167           | NE1:Trp57           | C''-strand           | H-bond                  |
| <b>Northwest</b>  | VP1 (LP) BC-loop<br>(twisted)   | OG1:Thr99          | OE2:Glu43           | CC'-loop             | proximity               |
|                   |                                 | ND1:Asn100         | O:Arg44             | C'-strand            | proximity               |
|                   |                                 | CD:Lys101          | CE3:Trp46           | C'-strand            | hydrophobic             |
|                   |                                 | CD:Lys101          | CB:Trp46            | C'-strand            | hydrophobic             |
|                   |                                 | CG:Lys103          | CZ3:Trp46           | C'-strand            | hydrophobic             |
| <b>West</b>       | VP1 (LP) C-strand               | O:Phe105           | N:Gly102            | FG-loop              | long H-bond             |
|                   |                                 | CZ:Phe105          | NE1:Trp57           | C''-strand           | hydrophobic             |
|                   |                                 | CB:Val107          | CG:Pro101           | FG-loop              | hydrophobic             |
|                   |                                 | O:Val107           | OG1:Thr99           | FG-loop              | H-bond                  |
|                   |                                 | CD1:Trp108         | OG1:Thr99           | FG-loop              | vanderWaals             |
| <b>Southwest</b>  | VP1 (LP) C-term<br>prox.        | CE1:Tyr280         | CD2:Tyr27           | BC-loop              | hydrophobic             |
|                   |                                 | CD1:Tyr280         | CG:Pro29            | BC-loop              | proximity               |
|                   |                                 | CA:Gly281          | CB:Pro29            | BC-loop              | proximity               |
|                   | VP2 (LP) EF-loop                | O:Asn137           | N:Tyr27             | BC-loop              | H-bond                  |
|                   |                                 | CG2:Thr139         | CA:Lys74            | DE-loop              | hydrophobic             |
|                   |                                 | CG2:Thr139         | CB:Ala73            | DE-loop              | hydrophobic             |
|                   |                                 | OG1:Thr140         | OH:Tyr27            | BC-loop              | H-bond                  |
|                   |                                 | CG2:Thr140         | CE2:Tyr27           | BC-loop              | hydrophobic             |
|                   |                                 | CD2:His142         | CB:Ala73            | DE-loop              | hydrophobic             |
|                   |                                 | OE1:Gln167         | NZ:Lys74            | DE-loop              | H-bond                  |
| <b>South</b>      | VP1 (LP) GH-loop                | CD2:Leu228         | CB:Ala73            | DE-loop              | hydrophobic             |

|                  |                                 | dist.              |                     |                      |                         |
|------------------|---------------------------------|--------------------|---------------------|----------------------|-------------------------|
|                  | <b>PV-PVSP29F</b>               | <b>PV residues</b> | <b>VHH residues</b> | <b>VHH-structure</b> | <b>Interaction type</b> |
| <b>North</b>     | VP1 (LP) EF-loop                | CA:Pro162          | NE2:Gln29           | BC-loop              | proximity               |
|                  |                                 | CB:Val166          | CE1:Tyr27           | BC-loop              | hydrophobic             |
|                  |                                 | OE1:Glu168         | OD1:Asn77           | DE-loop              | proximity               |
| <b>Northwest</b> | VP1 (LP) C-strand               | CD:Lys109          | CD1:Leu103          | FG-loop              | hydrophobic             |
| <b>Southwest</b> | VP2 (LP) EF-loop                | CG2:Thr139         | CA:Ala108           | FG-loop              | hydrophobic             |
|                  |                                 | CD2:His142         | CZ:Tyr113           | FG-loop              | hydrophobic             |
| <b>South</b>     | VP1 (LP) GH-loop<br>dist.       | NZ:Lys214          | OD1:Asn116          | FG-loop              | salt link               |
|                  |                                 | CA:Leu224          | CH2:Trp118          | G-strand             | hydrophobic             |
|                  |                                 | OD1:Asp226         | CA:Tyr113           | FG-loop              | vanderWaals             |
|                  |                                 | CD2:Leu228         | CB:Tyr113           | FG-loop              | hydrophobic             |
| <b>Center</b>    | VP3 (RP) GH-loop                | OD2:Asp181         | N:Gln1              | N-term               | H-bond                  |
|                  |                                 | O:Asp181           | ND2:Asn116          | FG-loop              | H-bond                  |
| <b>East</b>      | VP1 (RP) C-term<br>ext.         | OG:Ser295          | NE2:Gln1            | N-term               | H-bond                  |
|                  | VP3 (RP) CD-<br>helix           | O:Ser91            | N:Gln1              | N-term               | H-bond                  |
| <b>Northeast</b> | VP1 (RP) C-term<br>ext. (prox.) | CB:Pro282          | CG:Gln107           | FG-loop              | hydrophobic             |

<sup>a</sup>: LP (leftmost protomer) and RP (rightmost protomer) indicate the protomer to which the poliovirus structure involved in binding belongs. ext. stands for extension and prox. and dist. for proximal and distal, respectively.
